# Supplementary material for: Mesenchymal stem cells release exosomes that transfer miRNAs to endothelial cells and promote angiogenesis
Source: PubMed Central journal article supplement (PMC5542178; doi:10.18632/oncotarget.16778), 2017-04-01
Supplement: oncotarget-08-45200-s001.pdf [file oncotarget-08-45200-s001.pdf]

## Mesenchymal stem cells release exosomes that transfer miRNAs to endothelial cells and promote angiogenesis

### Supplementary Materials

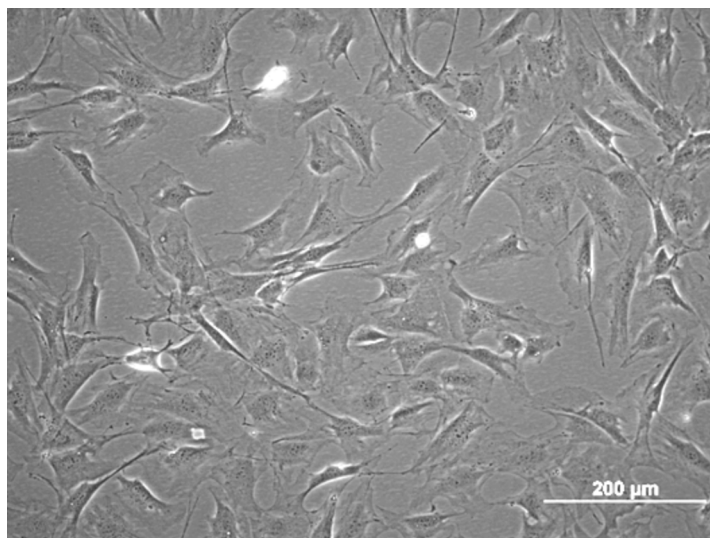

**Supplementary Figure 1: Morphology of MSCs photographed under microscope.** It exhibited a spindle-shaped fibroblast-like morphology.

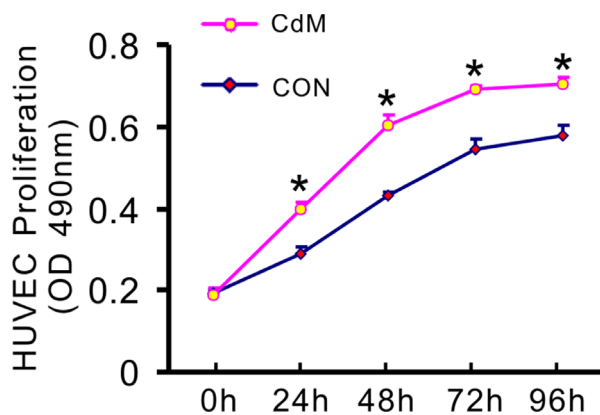

**Supplementary Figure 2: CdM derived from MSCs promotes the proliferation of HUVECs.** MTS assay in HUVECs treated with or without CdM<sup>MSC</sup> (\*,  $P < 0.05$  vs CON).

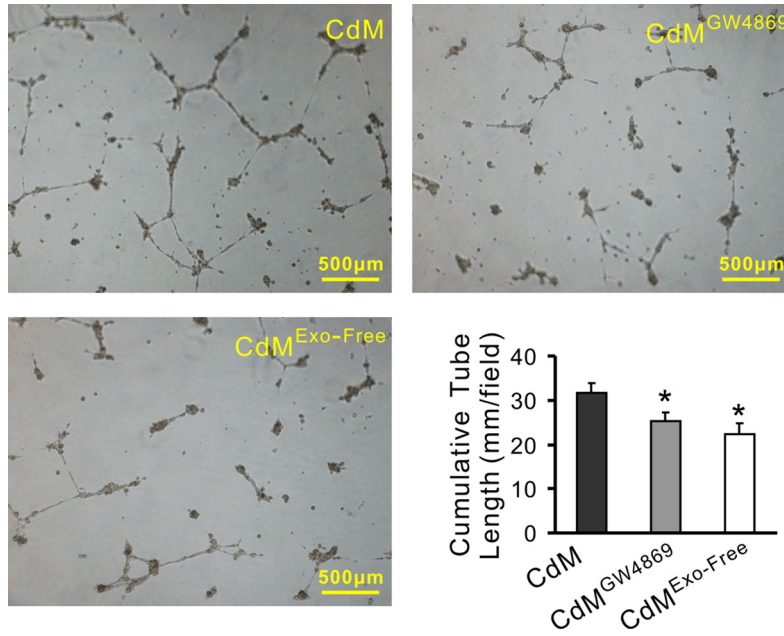

**Supplementary Figure 3: The tube-like structure formation of HUVECs was reduced after inhibiting or depleting the exosomes from the CdM.** Representative images of tube-like structures and quantitative analysis of the total tube length (4× magnification microscopic fields) (\* $P < 0.05$  vs CdM<sup>MSC</sup>).

**Supplementary Table 1: The expression of proangiogenic miRNAs in CdM<sup>MSC</sup> after adding into HUVECs culture for 48 h (\**P* < 0.05 vs CdM<sup>MSC</sup>)**

| <b>Downregulated</b> |                                             |                                                         |
|----------------------|---------------------------------------------|---------------------------------------------------------|
| <b>miRNA</b>         | <b>CdM<sup>MSC</sup> 2<sup>(-ΔCt)</sup></b> | <b>CdM<sup>MSC</sup> with HUVECs 2<sup>(-ΔCt)</sup></b> |
| miR-296-3p           | 1.076 ± 0.026                               | 0.166 ± 0.015*                                          |
| miR-378              | 0.572 ± 0.078                               | 0.239 ± 0.028*                                          |
| miR-18a              | 0.063 ± 0.006                               | 0.036 ± 0.002*                                          |
| miR-296-5p           | 0.060 ± 0.005                               | 0.003 ± 0.001*                                          |
| miR-9                | 0.0034 ± 0.0006                             | 0.0013 ± 0.0003*                                        |

  

| <b>Upregulated</b> |                                             |                                                         |
|--------------------|---------------------------------------------|---------------------------------------------------------|
| <b>miRNA</b>       | <b>CdM<sup>MSC</sup> 2<sup>(-ΔCt)</sup></b> | <b>CdM<sup>MSC</sup> with HUVECs 2<sup>(-ΔCt)</sup></b> |
| miR-17             | 0.513 ± 0.052                               | 1.910 ± 0.197*                                          |
| miR-20a            | 0.445 ± 0.048                               | 1.503 ± 0.213*                                          |
| miR-93             | 0.506 ± 0.092                               | 1.266 ± 0.188*                                          |
| miR-132            | 0.060 ± 0.013                               | 0.307 ± 0.081*                                          |

  

| <b>No significant differences</b> |                                             |                                                         |
|-----------------------------------|---------------------------------------------|---------------------------------------------------------|
| <b>miRNA</b>                      | <b>CdM<sup>MSC</sup> 2<sup>(-ΔCt)</sup></b> | <b>CdM<sup>MSC</sup> with HUVECs 2<sup>(-ΔCt)</sup></b> |
| miR-23a                           | 24.220 ± 4.602                              | 19.767 ± 0.097                                          |
| miR-23b                           | 21.017 ± 2.057                              | 17.646 ± 1.037                                          |
| miR-27a                           | 38.411 ± 3.759                              | 39.553 ± 1.744                                          |
| miR-27b                           | 28.133 ± 3.028                              | 30.699 ± 0.602                                          |
| miR-92a                           | 4.653 ± 0.704                               | 3.959 ± 0.019                                           |
| miR-130a                          | 5.464 ± 0.027                               | 5.666 ± 0.444                                           |
| miR-210                           | 0.580 ± 0.003                               | 0.597 ± 0.020                                           |
